# Supplementary material for: Prognostic value of the MicroRNA regulators Dicer and Drosha in non-small-cell lung cancer: co-expression of Drosha and miR-126 predicts poor survival
Source: PubMed Central journal article supplement (PMC4269969; doi:10.1186/1472-6890-14-45), 2014-12-11
Supplement: 12907_2014_190_MOESM1_ESM.pdf [file 12907_2014_190_MOESM1_ESM.pdf]

**Table S1.** Prognostic Clinicopathologic Variables as Predictors for Disease-Specific Survival in 335 NSCLC Patients (Univariate Analyses; Log-rank Test) adapted from [19].

| Characteristic               | Patients (n) | Patients (%) | Median survival (months) | 5-Year survival (%) | P                 |
|------------------------------|--------------|--------------|--------------------------|---------------------|-------------------|
| <b>Age</b>                   |              |              |                          |                     | 0.34              |
| ≤ 65 years                   | 156          | 47           | 83                       | 55                  |                   |
| > 65 years                   | 179          | 53           | NR                       | 60                  |                   |
| <b>Sex</b>                   |              |              |                          |                     | 0.20              |
| Female                       | 82           | 25           | 190                      | 63                  |                   |
| Male                         | 253          | 75           | 83                       | 56                  |                   |
| <b>Smoking</b>               |              |              |                          |                     | 0.23              |
| Never                        | 15           | 5            | 19                       | 43                  |                   |
| Current                      | 215          | 64           | NR                       | 60                  |                   |
| Former                       | 105          | 31           | 71                       | 54                  |                   |
| <b>Performance status</b>    |              |              |                          |                     | <b>0.013</b>      |
| ECOG 0                       | 197          | 59           | NR                       | 63                  |                   |
| ECOG 1                       | 120          | 36           | 64                       | 52                  |                   |
| ECOG 2                       | 18           | 5            | 25                       | 33                  |                   |
| <b>Weight loss</b>           |              |              |                          |                     | 0.71              |
| < 10%                        | 303          | 90           | 127                      | 58                  |                   |
| > 10%                        | 32           | 10           | 98                       | 57                  |                   |
| <b>Histology</b>             |              |              |                          |                     | <b>0.028</b>      |
| SCC                          | 191          | 57           | NR                       | 66                  |                   |
| Adenocarcinoma               | 95           | 28           | 54                       | 45                  |                   |
| LCC                          | 31           | 9            | 98                       | 56                  |                   |
| BAC                          | 18           | 5            | NR                       | 67                  |                   |
| <b>Differentiation</b>       |              |              |                          |                     | <b>&lt; 0.001</b> |
| Poor                         | 138          | 41           | 47                       | 47                  |                   |
| Moderate                     | 144          | 43           | 190                      | 64                  |                   |
| Well                         | 53           | 16           | NR                       | 68                  |                   |
| <b>Surgical procedure</b>    |              |              |                          |                     | <b>0.004</b>      |
| Lobectomy + Wedge*           | 243          | 73           | 190                      | 61                  |                   |
| Pneumonectomy                | 92           | 27           | 37                       | 47                  |                   |
| <b>Pathological stage</b>    |              |              |                          |                     | <b>&lt; 0.001</b> |
| I                            | 157          | 47           | 190                      | 71                  |                   |
| II                           | 136          | 41           | 61                       | 51                  |                   |
| IIIa                         | 42           | 12           | 17                       | 23                  |                   |
| <b>Tumor status</b>          |              |              |                          |                     | <b>&lt; 0.001</b> |
| 1                            | 85           | 25           | 190                      | 74                  |                   |
| 2                            | 188          | 56           | 84                       | 57                  |                   |
| 3                            | 62           | 19           | 25                       | 36                  |                   |
| <b>Nodal status</b>          |              |              |                          |                     | <b>&lt; 0.001</b> |
| 0                            | 232          | 69           | 190                      | 66                  |                   |
| 1                            | 76           | 23           | 35                       | 43                  |                   |
| 2                            | 27           | 8            | 18                       | 18                  |                   |
| <b>Surgical margins</b>      |              |              |                          |                     | 0.29              |
| Free                         | 307          | 92           | 190                      | 58                  |                   |
| Not free                     | 28           | 8            | 47                       | 47                  |                   |
| <b>Vascular infiltration</b> |              |              |                          |                     | <b>&lt; 0.001</b> |
| No                           | 284          | 85           | 190                      | 58                  |                   |
| Yes                          | 51           | 15           | 27                       | 32                  |                   |

**Table S2. Expression of Dicer, Drosha and miR-126 by histology**

| Histology    | Dicer* |           | Drosha** |           | miR-126*** |           |
|--------------|--------|-----------|----------|-----------|------------|-----------|
|              | Mean   | 95% CI    | Mean     | 95% CI    | Mean       | 95% CI    |
| squam        | 1.28   | 1.16-1.40 | 1.47     | 1.36-1.58 | 1.27       | 1.14-1.41 |
| adeno        | 0.95   | 0.78-1.12 | 1.28     | 1.13-1.43 | 0.92       | 0.75-1.10 |
| bac          | 1.50   | 1.00-2.00 | 1.44     | 0.99-1.89 | 1.08       | 0.54-1.62 |
| large-undiff | 1.17   | 0.86-1.49 | 1.44     | 1.15-1.73 | 1.07       | 0.79-1.35 |
|              |        |           |          |           |            |           |
| Total        | 1.18   | 1.09-1.28 | 1.41     | 1.33-1.49 | 1.14       | 1.05-1.24 |

\* P = 0.008

\*\* P = 0.282

\*\*\* P = 0.020

**Table S3.** Cox regression analysis summarizing significant independent prognostic factors in the total patient material with Dicer and Drosha as covariates on a continuous scale.

| Factor                       | HR   | 95% CI       | P       |
|------------------------------|------|--------------|---------|
| <b>Tumor status</b>          |      |              | <0.001* |
| 1                            | 1.00 |              |         |
| 2                            | 1.84 | 1.10 – 3.07  | 0.021   |
| 3                            | 3.65 | 2.04 – 6.52  | <0.001  |
| <b>Nodal status</b>          |      |              | <0.001* |
| 0                            | 1.00 |              |         |
| 1                            | 2.01 | 1.30 – 3.11  | 0.002   |
| 2                            | 2.82 | 1.63 – 4.91  | <0.001  |
| <b>Histology</b>             |      |              | 0.006*  |
| Squamous cell                | 1.00 |              |         |
| Adeno                        | 1.85 | 1.24 – 2.76  | 0.003   |
| Bac                          | 0.51 | 0.06 – 4.08  | 0.527   |
| Large undiff                 | 0.81 | 0.41 – 1.59  | 0.536   |
| <b>Differentiation</b>       |      |              | 0.016*  |
| Poor                         | 1.00 |              |         |
| Moderate                     | 0.57 | 0.37 – 0.86  | 0.008   |
| Well                         | 0.55 | 0.27 – 1.09  | 0.085   |
| <b>Performance status</b>    |      |              | 0.005*  |
| Normal                       | 1.00 |              |         |
| Slightly reduced             | 1.81 | 1.23 – 2.68  | 0.003   |
| In bed < 50%                 | 2.08 | 0.92 – 4.71  | 0.079   |
| <b>Vascular infiltration</b> |      |              |         |
| No                           | 1.00 |              |         |
| Yes                          | 2.25 | 1.42 – 3.58  | 0.001   |
| <b>Dicer**</b>               | 1.04 | 0.84 – 1.30  | 0.712   |
| <b>Drosha***</b>             | 0.94 | 0.704 – 1.27 | 0.700   |

\*Overall significance as a prognostic factor.

\*\* $B=0.042$

\*\*\* $B=-0.058$

HR: Hazard ratio; CI: confidence interval

**Table S4.** Expression of Dicer by histology, performance status, tumor differentiation, tumor status, nodal status and vascular infiltration

|                              | <b>Dicer</b>  |             |               |                |
|------------------------------|---------------|-------------|---------------|----------------|
| <b>Histology</b>             | <b>Number</b> | <b>Mean</b> | <b>95% CI</b> | <b>P-value</b> |
| SCC                          | 186           | 1.28        | 1.16-1.40     | 0.012          |
| Other NSCLC                  | 135           | 1.05        | 0.90-1.19     |                |
|                              |               |             |               |                |
| <b>Performance status</b>    |               |             |               |                |
| ECOG = 0                     | 191           | 1.18        | 1.06-1.30     | 0.915          |
| ECOG = 1-2                   | 130           | 1.19        | 1.05-1.33     |                |
|                              |               |             |               |                |
| <b>Tumor differentiation</b> |               |             |               |                |
| Poor                         | 134           | 1.11        | 0.96-1.25     | 0.209          |
| Moderate                     | 142           | 1.28        | 1.14-1.42     |                |
| Well                         | 45            | 1.12        | 0.88-1.37     |                |
|                              |               |             |               |                |
| <b>Tumor status</b>          |               |             |               |                |
| 1                            | 81            | 1.36        | 1.18-1.55     | 0.072          |
| 2                            | 180           | 1.11        | 0.99-1.23     |                |
| 3                            | 60            | 1.17        | 0.95-1.38     |                |
|                              |               |             |               |                |
| <b>Nodal status</b>          |               |             |               |                |
| 0                            | 224           | 1.20        | 1.09-1.31     | 0.702          |
| 1                            | 73            | 1.11        | 0.91-1.32     |                |
| 2                            | 24            | 1.24        | 0.91-1.58     |                |
|                              |               |             |               |                |
| <b>Vascular infiltration</b> |               |             |               |                |
| Yes                          | 50            | 1.41        | 1.18-1.64     | 0.035          |
| No                           | 271           | 1.14        | 1.04-1.24     |                |

**Table S5.** Cox regression analysis summarizing significant independent prognostic factors exploring Dicer interaction with histology.

| Factor                       | HR   | 95% CI      | P       |
|------------------------------|------|-------------|---------|
| <b>Tumor status</b>          |      |             | <0.001* |
| 1                            | 1.00 |             |         |
| 2                            | 1.68 | 1.03 – 2.74 | 0.040   |
| 3                            | 3.10 | 1.78 – 5.41 | <0.001  |
| <b>Nodal status</b>          |      |             | <0.001* |
| 0                            | 1.00 |             |         |
| 1                            | 2.19 | 1.45 – 3.32 | <0.001  |
| 2                            | 3.04 | 1.77 – 5.23 | <0.001  |
| <b>Histology</b>             |      |             |         |
| SCC                          | 1.00 |             |         |
| Other NSCLC                  | 0.98 | 0.51 – 1.89 | 0.951   |
| <b>Differentiation</b>       |      |             | 0.053*  |
| Poor                         | 1.00 |             |         |
| Moderate                     | 0.66 | 0.45 – 0.97 | 0.034   |
| Well                         | 0.58 | 0.31 – 1.10 | 0.096   |
| <b>Performance status</b>    |      |             |         |
| ECOG = 0                     | 1.00 |             |         |
| ECOG = 1-2                   | 1.80 | 1.26 – 2.59 | 0.001   |
| <b>Vascular infiltration</b> |      |             |         |
| No                           | 1.00 |             |         |
| Yes                          | 1.80 | 1.26 – 3.12 | 0.003   |
| <b>Dicer**</b>               | 0.87 | 0.68 – 1.10 | 0.257   |
| <b>Dicer*histology***</b>    | 1.37 | 1.10 – 1.70 | 0.005   |

\*Overall significance as a prognostic factor.

\*\* $B = 0.313$

\*\*\* $B = -0.141$

HR: Hazard ration; CI: confidence interval

**Table S6.** Cox regression analysis summarizing significant independent prognostic factors exploring Dicer interaction with ECOG.

| Factor                       | HR   | 95% CI      | P       |
|------------------------------|------|-------------|---------|
| <b>Tumor status</b>          |      |             | <0.001* |
| 1                            | 1.00 |             |         |
| 2                            | 1.58 | 0.97 – 2.58 | 0.067   |
| 3                            | 2.96 | 1.70 – 5.15 | <0.001  |
| <b>Nodal status</b>          |      |             | <0.001* |
| 0                            | 1.00 |             |         |
| 1                            | 2.21 | 1.45 – 3.35 | <0.001  |
| 2                            | 2.80 | 1.62 – 4.86 | <0.001  |
| <b>Histology</b>             |      |             |         |
| SCC                          | 1.00 |             |         |
| Other NSCLC                  | 1.57 | 1.07 – 2.30 | 0.022   |
| <b>Differentiation</b>       |      |             | 0.092*  |
| Poor                         | 1.00 |             |         |
| Moderate                     | 0.70 | 0.47 – 1.05 | 0.081   |
| Well                         | 0.58 | 0.31 – 1.09 | 0.090   |
| <b>Performance status</b>    |      |             |         |
| ECOG = 0                     | 1.00 |             |         |
| ECOG = 1-2                   | 1.88 | 1.30 – 2.70 | 0.001   |
| <b>Vascular infiltration</b> |      |             |         |
| No                           | 1.00 |             |         |
| Yes                          | 2.02 | 1.28 – 3.18 | 0.003   |
| <b>Dicer**</b>               | 0.97 | 0.72 – 1.32 | 0.862   |
| <b>Dicer*ECOG***</b>         | 1.12 | 0.83 – 1.50 | 0.475   |

\*Overall significance as a prognostic factor.

\*\*B = -0.027

\*\*\*B = 0.629

HR: Hazard ration; CI: confidence interval

**Table S7.** Cox regression analysis summarizing significant independent prognostic factors exploring Dicer interaction with vascular infiltration.

| Factor                                | HR   | 95% CI      | P       |
|---------------------------------------|------|-------------|---------|
| <b>Tumor status</b>                   |      |             | <0.001* |
| 1                                     | 1.00 |             |         |
| 2                                     | 1.58 | 0.97 – 2.58 | 0.067   |
| 3                                     | 2.96 | 1.70 – 5.15 | <0.001  |
| <b>Nodal status</b>                   |      |             | <0.001* |
| 0                                     | 1.00 |             |         |
| 1                                     | 2.21 | 1.45 – 3.35 | <0.001  |
| 2                                     | 2.80 | 1.62 – 4.86 | <0.001  |
| <b>Histology</b>                      |      |             |         |
| SCC                                   | 1.00 |             |         |
| Other NSCLC                           | 1.57 | 1.07 – 2.30 | 0.022   |
| <b>Differentiation</b>                |      |             | 0.092*  |
| Poor                                  | 1.00 |             |         |
| Moderate                              | 0.70 | 0.47 – 1.05 | 0.081   |
| Well                                  | 0.58 | 0.31 – 1.10 | 0.090   |
| <b>Performance status</b>             |      |             |         |
| ECOG = 0                              | 1.00 |             |         |
| ECOG = 1-2                            | 1.88 | 1.30 – 2.70 | 0.001   |
| <b>Vascular infiltration</b>          |      |             |         |
| No                                    | 1.00 |             |         |
| Yes                                   | 2.02 | 1.28 – 3.18 | 0.003   |
| <b>Dicer**</b>                        | 1.04 | 0.84 – 1.29 | 0.708   |
| <b>Dicer*vascular infiltration***</b> | 0.45 | 0.48 – 1.49 | 0.563   |

\*Overall significance as a prognostic factor.

\*\* $B = 0.041$

\*\*\* $B = -0.166$

HR: Hazard ration; CI: confidence interval
